# Supplementary material for: Donor-derived stem-cells and epithelial mesenchymal transition in squamous cell carcinoma in transplant recipients
Source: PubMed Central journal article supplement (PMC4747169; doi:10.18632/oncotarget.6359), 2015-11-22
Supplement: oncotarget-06-41497-s001.pdf [file oncotarget-06-41497-s001.pdf]

# Donor-derived stem-cells and epithelial mesenchymal transition in squamous cell carcinoma in transplant recipients

## Supplementary Material

### A Laser-microdissection

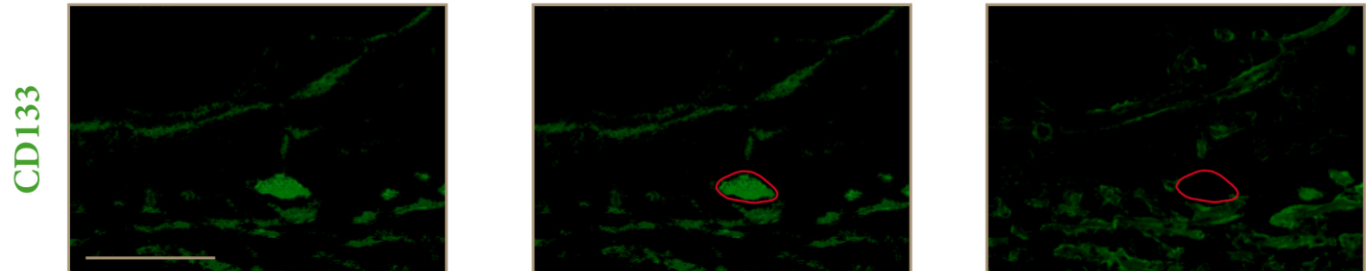

### B

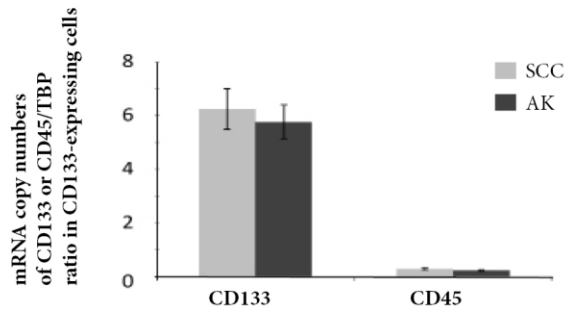

supplementary figure 1: Laser microdissection of a CD133-expressing epidermal cell (bar=30 $\mu$ m). Droplet digital PCR analyses show that laser-microdissected cells express CD133 (prominin 1) and not CD45

# Actinic Keratosis

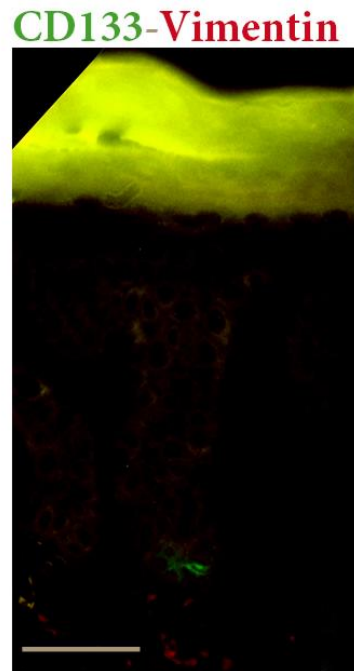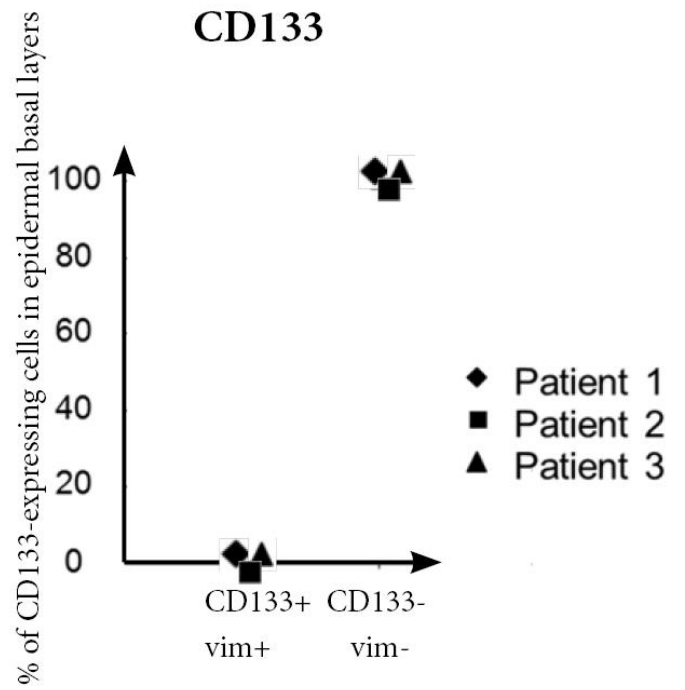

supplementary figure 2: Epidermal cells expressing CD133 but not vimentin in actinic keratoses
